# Supplementary material
Source: Springer Nature journal article supplement (https://www.springermedizin.de/resource/supplementary/12913_2014_3411_MOESM3_ESM.pdf/9532614)

• differences based on VTs minus HAs    ■ mean estimate    — ICER threshold at £20,000

Cost difference

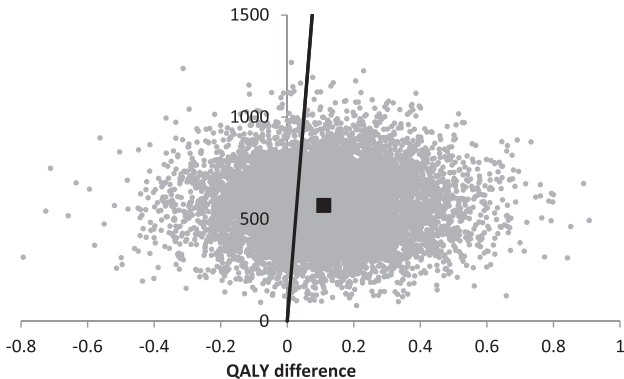

Supplement: MOESM3 [file 9532614]
